# Supplementary material
Source: PubMed Central journal article supplement (PMC2575146)
Supplement: E08-04-0426_1.pdf [file E08-04-0426_1.pdf]

## E08-04-0426 Bankaitis

### LEGENDS TO SUPPLEMENTAL FIGURES.

**Supplemental Figure S1.** Morphological manifestations of secretory pathway dysfunction in *sec14-1<sup>ts</sup>* (A) and *sec6-4<sup>ts</sup>* mutants (B) were analyzed by thin-section electron microscopy. Yeast were cultured to early logarithmic growth phase in YPD medium at 30°C. The cultures were then shifted to the 37°C for the indicated times. Cells were fixed, embedded in Spurr's resin, stained with uranyl acetate and imaged using a transmission electron microscope (20 kV). Representative images are shown (bar = 2µm). Berkeley bodies (defective TGN/endosomal structures) and undocked secretory vesicles are highlighted by arrows in images of the *sec14-1<sup>ts</sup>* and *sec6-4<sup>ts</sup>* mutants, respectively.

**Supplemental Figure S2.** CPY maturation in *sec14-1<sup>ts</sup> tlg2Δ* yeast. (A) Wildtype, *sec14-1<sup>ts</sup>*, *tlg2Δ*, and *sec14-1<sup>ts</sup> tlg2Δ* yeast were grown in minimal media at 30°C, and then shifted to 37°C or maintained at 30°C for 2hrs, and radiolabeled with [<sup>35</sup>S]-amino acids for 30 min. Chase (0, 15, 30 and 45 min) was initiated by introducing 2mM of both unlabeled methionine and cysteine, and reactions were terminated with ice-cold trichloroacetic acid (final concentration 5%). CPY was immunoprecipitated with anti-CPY antibodies (1µl/OD600<sub>nm</sub>). (B) Wild-type, *sec14-1<sup>ts</sup>*, *tlg2Δ*, and *sec14-1<sup>ts</sup> tlg2Δ* yeast were grown in minimal media at 30°C, and then shifted to 33.5°C or maintained at 30°C for 2hrs, and radiolabeled with [<sup>35</sup>S]-amino acids for 30 min. Chase (10 min) was initiated by introducing 2mM of both unlabeled methionine and cysteine, and reactions were terminated with ice-cold trichloroacetic acid (final concentration 5%). CPY was immunoprecipitated with anti-CPY antibodies (1µl/OD600<sub>nm</sub>). (C) Whole cell lysates were prepared from yeast strains of the indicated genotype, resolved by SDS-PAGE and blotted to

nitrocellulose. Blots were probed with either anti-alpha factor or anti-Sec61p polyclonal antibody. Where indicated strains were grown in the presence of 100µg/ml tunicamycin (Tm). The ER translocated, signal peptide cleaved, form of alpha-factor (Pαf) and the core glycosylated pαf modified on each of its three N-linked glycosylation sites (g3αf) are indicated at right. Wild-type yeast and *sec14-1<sup>ts</sup>* mutants efficiently mature alpha-factor and those forms are not detectable in the SDS-PAGE system employed. Sec61 (indicated at right) was monitored as normalization control.

**Supplemental Figure S3.** *sec14-1<sup>ts</sup> tlg2Δ* yeast possess growth deficiencies consistent with defects in the UPR. **(A)** Wild-type, *sec14-1<sup>ts</sup>*, *tlg2Δ*, and *sec14-1<sup>ts</sup> tlg2Δ* yeast were grown overnight at 30°C in either inositol containing (dark grey boxes) or inositol free media (light grey boxes). The A<sub>600nm</sub> was recorded both before (white boxes) and after growth. **(B)** Wildtype, *sec14-1<sup>ts</sup>*, *tlg2Δ*, and *sec14-1<sup>ts</sup> tlg2Δ* yeast were grown overnight at 30°C in synthetic defined media in the absence (dark grey boxes) or presence (light grey boxes) of DTT (4mM). The A<sub>600nm</sub> was recorded both before (white boxes) and after growth.

**Supplemental Figure S4.** Hac1<sup>1</sup> stability is not compromised in *sec14-1<sup>ts</sup> tlg2Δ* cells. Wild-type and *sec14-1<sup>ts</sup> tlg2Δ* yeast harboring a yeast centromeric vector encoding for the expression of the constitutively active HA-Hac1<sup>1</sup> mutant were grown in minimal media at 30°C, shifted to 37°C or maintained at 30°C for 2hrs and radiolabeled with [<sup>35</sup>S]-amino acids for 30 min. HA-Hac1<sup>1</sup> was immunoprecipitated with anti-HA antibody **(A)** and the relative amount of HA-Hac1<sup>1</sup> isolated from each sample was determined by densitometry **(B)**.

**Supplemental Figure S4.** Effects of genetic ablation of Isc1 and Ppn1 function on ceramide mass. **(A)** Dihydroceramide and **(B)** phytoceramide mass (fmol ceramide/nmol Pi) are reduced in *sec14-1<sup>ts</sup> tlg2Δ isc1Δ* and *sec14-1<sup>ts</sup> tlg2Δ ppn1Δ* yeast relative to *sec14-1<sup>ts</sup> tlg2Δ* parental cells. Quantitative lipidomics were used to measure endogenous yeast ceramides. Lipids were extracted from 3 pooled cultures (30 OD<sub>600nm</sub>) of each yeast strain grown overnight at 30°C and shifted to 37°C for 2 hours, prior to lipid extraction.

## LEGENDS TO SUPPLEMENTAL TABLES.

**Supplemental Table S1** – Plasmids used in this study.

**Supplemental Table S2** – A partial listing of genes identified in the *sec14-1<sup>ts</sup>* SGA screen.

These genes were consistently identified in three independent SGA experiments. The interactions with *arf1Δ*, *spo14Δ*, *sfh3Δ*, and *gcs1Δ* alleles confirm previous studies (see text), whereas the interactions with *snc2Δ*, *gsg1Δ* and *tlg2Δ* alleles are documented here. Otherwise, the listed genetic interactions have not been independently validated by meiotic analyses.

**Supplemental Table S3 - (A)** The 20 genes with the greatest magnitude of transcriptional down-regulation in *sec14-1<sup>ts</sup> tlg2Δ* mutants relative to wild-type. **(B)** The 20 genes with the greatest magnitude of transcriptional up-regulation in *sec14-1<sup>ts</sup> tlg2Δ* mutants relative to wild-type.

# Supplemental Figure S1

(A)

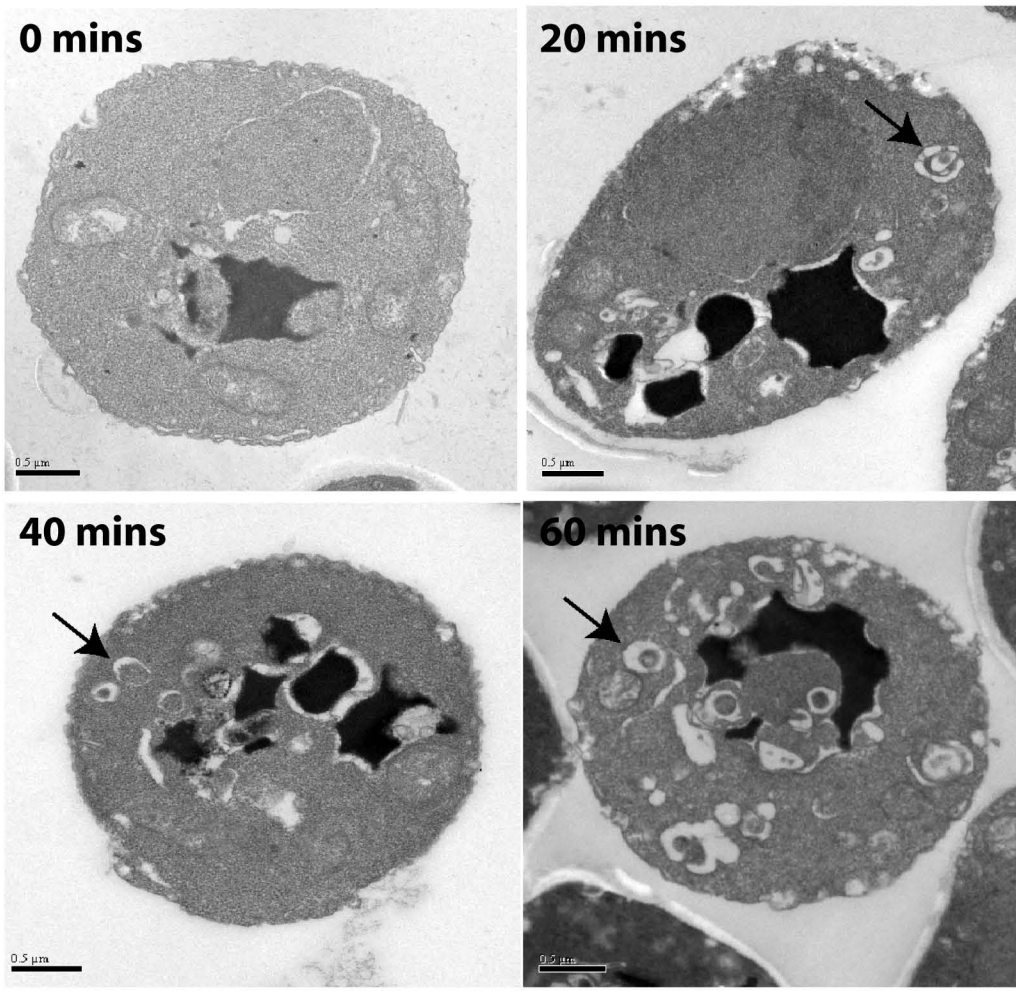

(B)

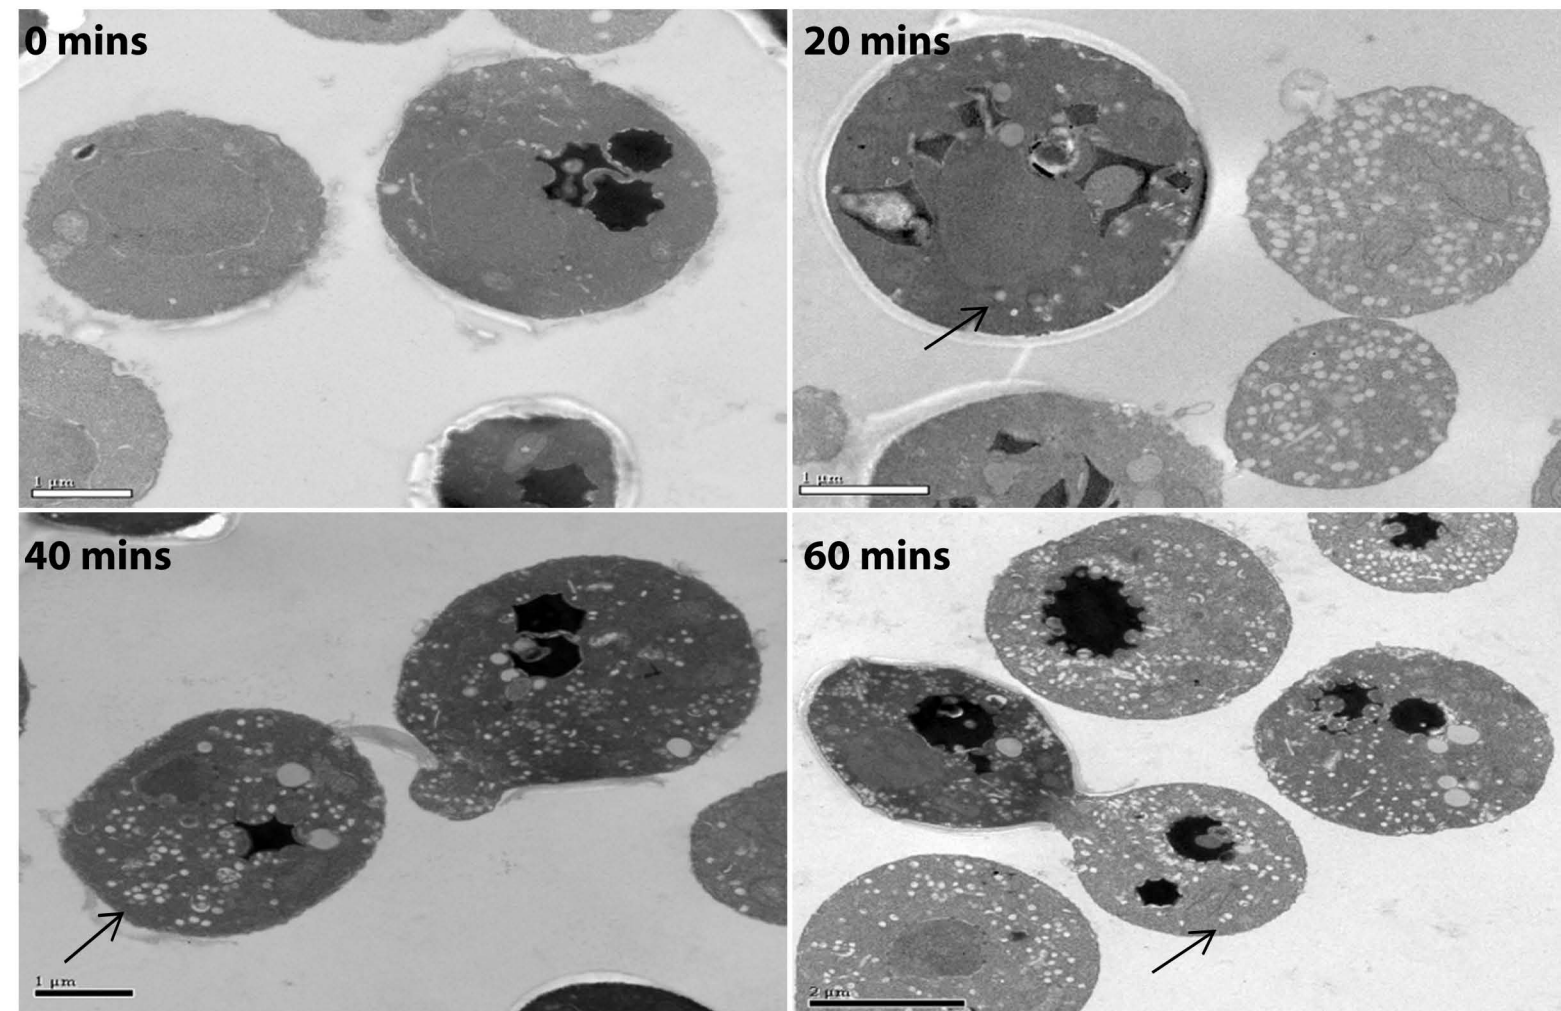

# Supplemental Figure S2

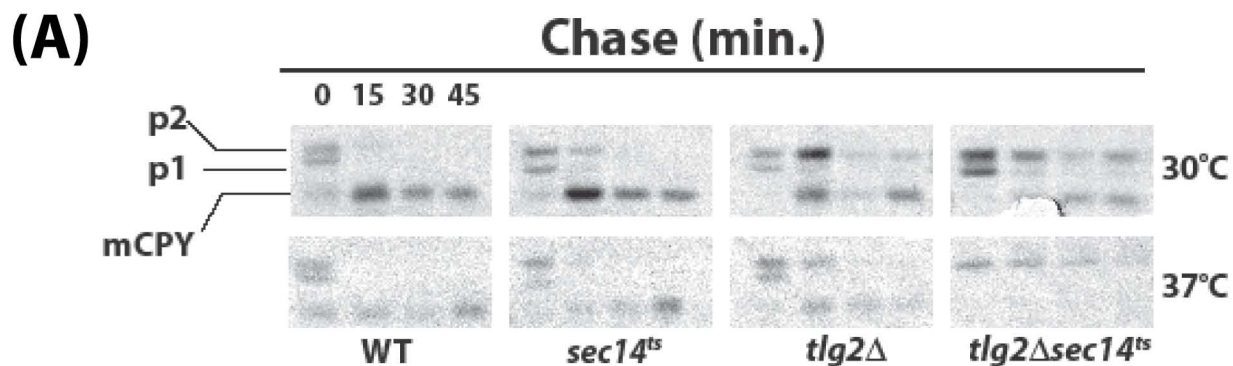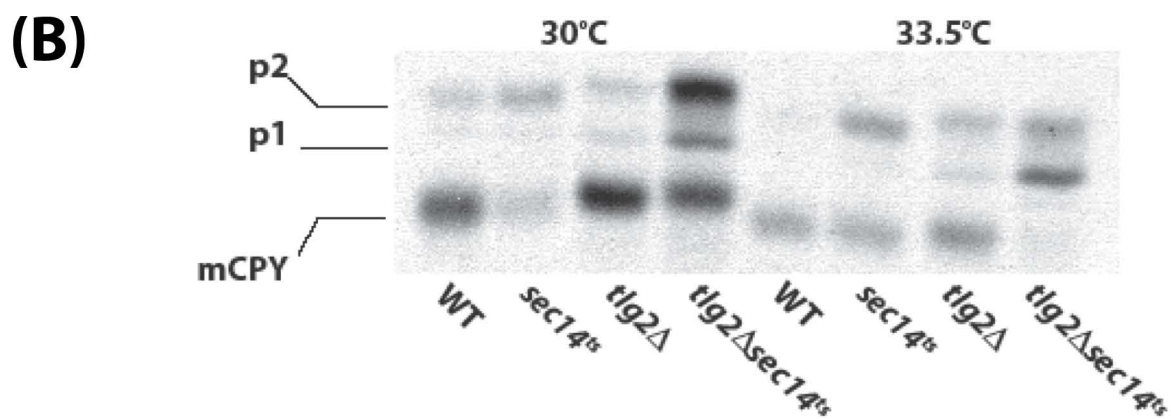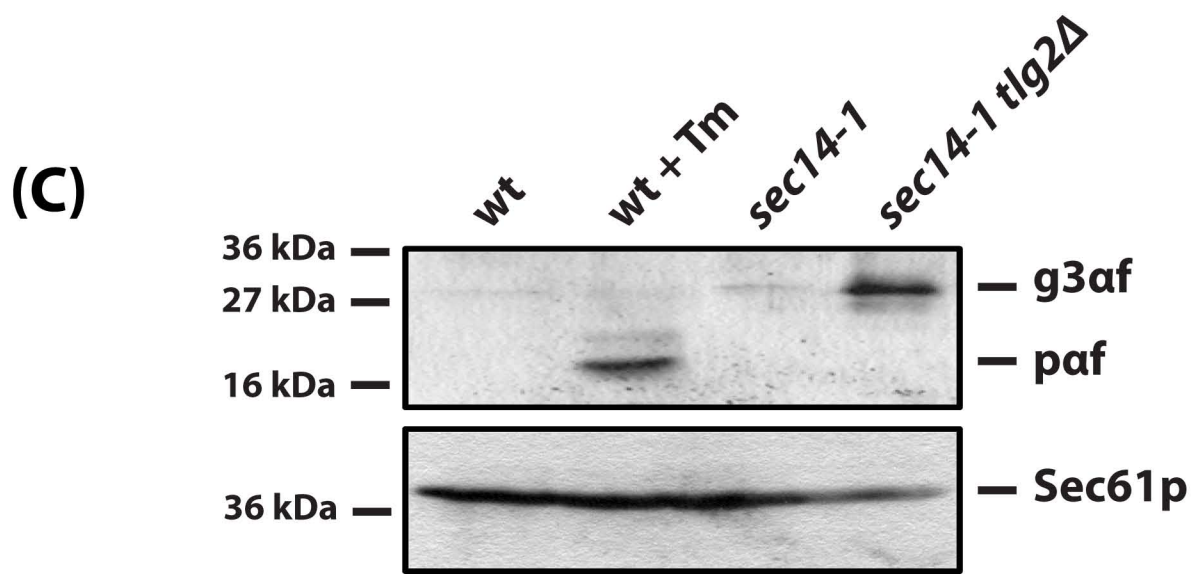

# Supplemental Figure S3

(A)

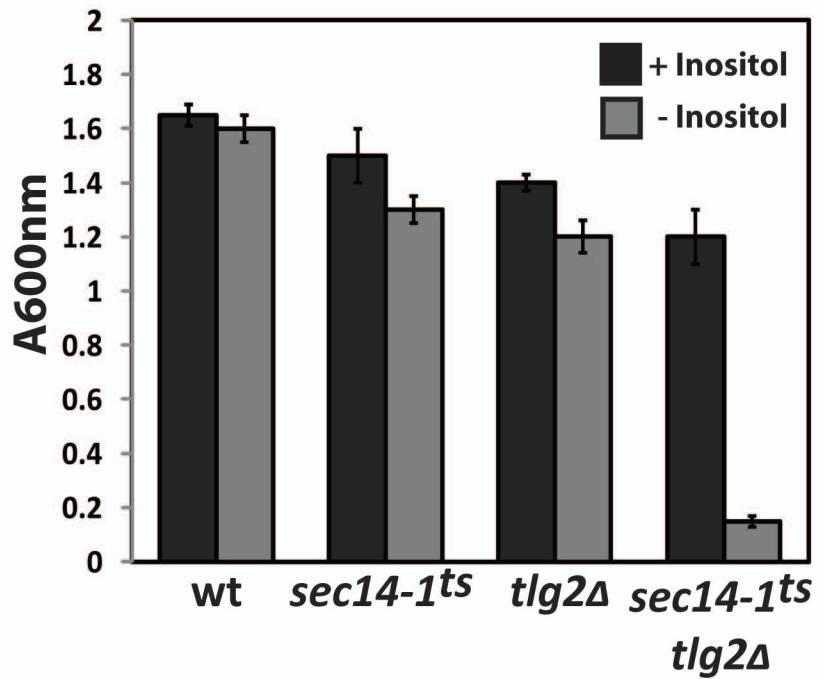

(B)

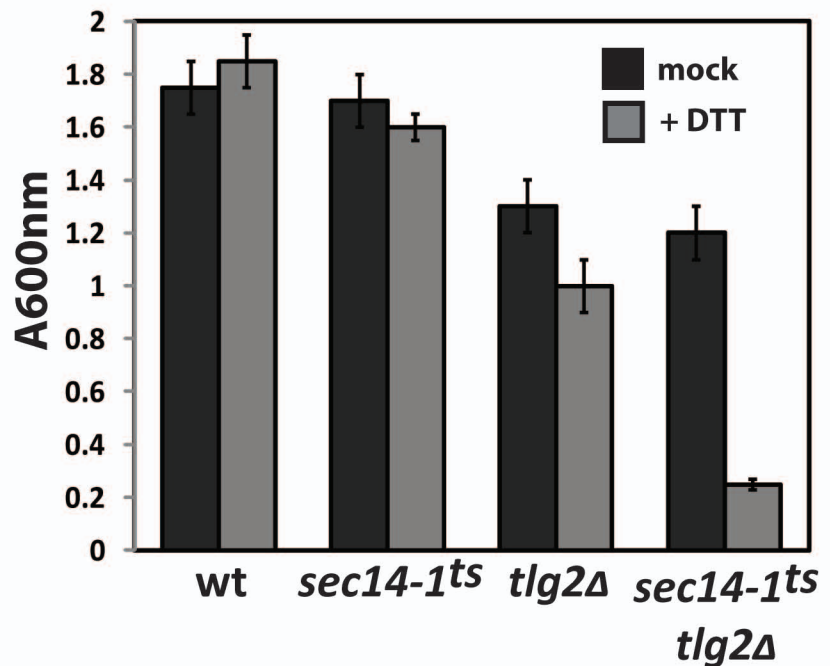

# Supplemental Figure S4

**(A)**

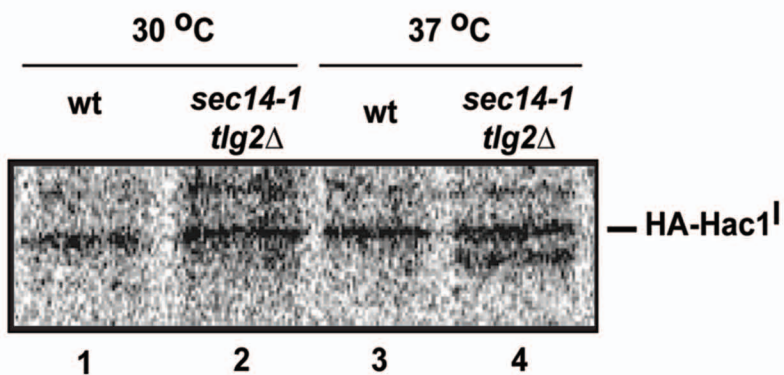

**(B)**

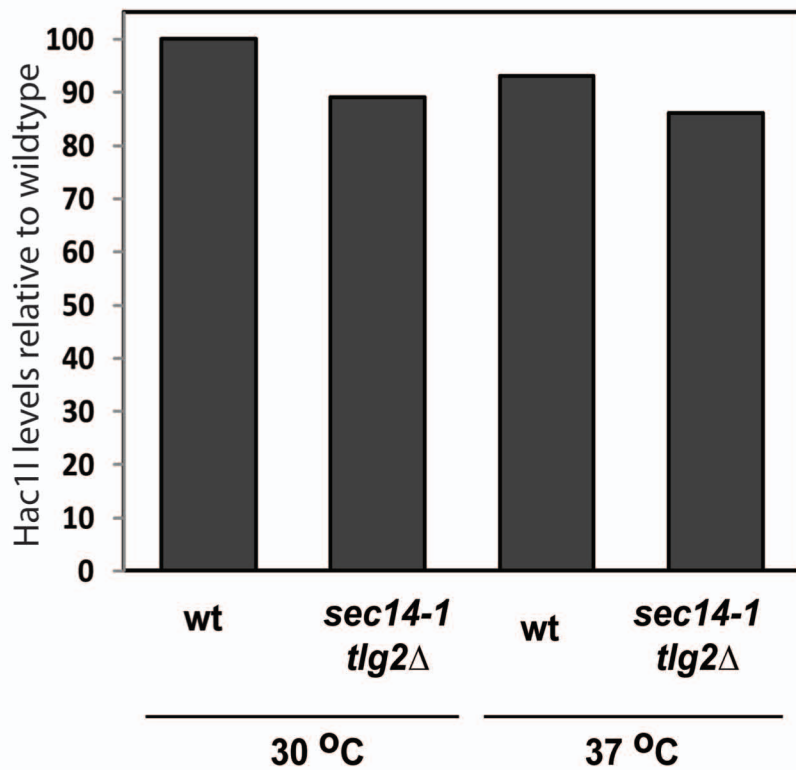



# Supplemental Figure S5

(A)

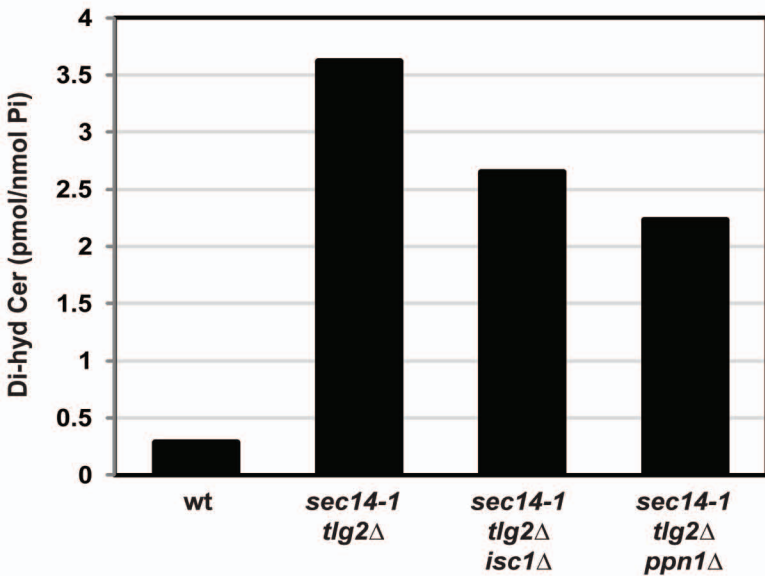

(B)

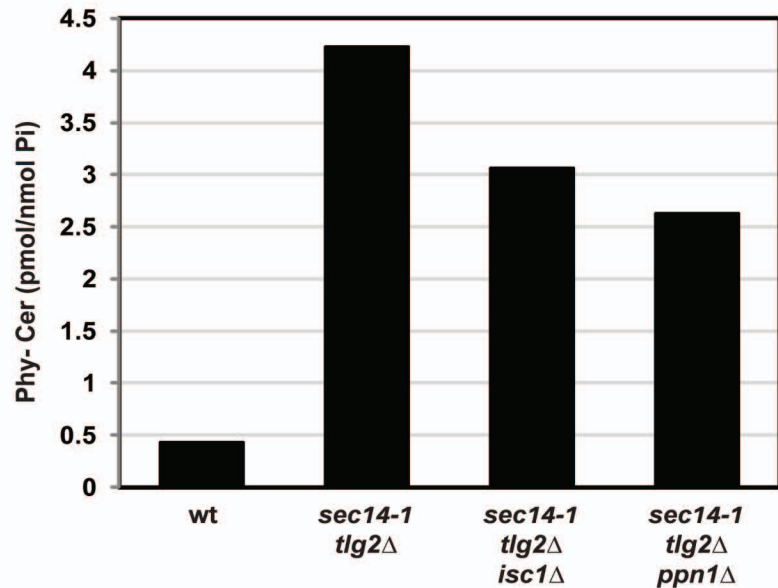

# Supplemental Table S1

| <b><u>Plasmid</u></b> | <b><u>Description</u></b>                         |
|-----------------------|---------------------------------------------------|
| pJT30                 | YCp ( <i>UPRE::LACZ, URA3</i> )                   |
| pRC43                 | YCp ( <i>HAC1<sup>I</sup>, HIS3</i> )             |
| pCTY468               | YCp ( <i>sec14-1, URA3</i> )                      |
| p180                  | YCp ( <i>GCN4::LACZ, URA3</i> )                   |
| pCB506                | YCp ( <i>GFP-SNC1, URA3</i> )                     |
| p DsRed-FYVE          | YCp ( <i>MET3::FYVE-dsRED, HIS3</i> )             |
| pCTY468               | YCp ( <i>sec14-1, URA3</i> )                      |
| pRE853                | Cloning intermediate for YIp <i>sec14-1::URA3</i> |
| pRE860                | Cloning intermediate for YIp <i>sec14-1::URA3</i> |
| pRE861                | YIp <i>sec14-1::URA3</i>                          |
| pCTY1501              | YCp ( <i>TLG2, URA3</i> )                         |
| pCTY1502              | YCp ( <i>tlg2<sup>R13Q</sup>, URA3</i> )          |
| pCTY1503              | YCp ( <i>tlg2<sup>Q278R</sup>, URA3</i> )         |
| pCTY1504              | YEpl ( <i>YPC1, URA3</i> )                        |

# Supplemental Table S2

## sec14<sup>Δs</sup> Synthetic Interactions: Synthetic Genomic Array Results

### PROTEIN TRAFFICKING

| <u>ORF</u> | <u>Gene</u> | <u>Function</u>                       |
|------------|-------------|---------------------------------------|
| YJL204C    | RCY1        | Endocytosis                           |
| YBR266C    | SLM6        | Endocytosis                           |
| YOR327C    | SNC2        | V-Snare Exocytosis                    |
| YDR108W    | GSG1        | ER to Golgi Transport (TRAPP Subunit) |
| YDL192W    | ARF1        | Exocytosis                            |
| YGR261C    | APL6        | Golgi to Vacuole Transport            |
| YER166W    | DNF1        | Phospholipid Flippase                 |
| YPL051W    | ARL3        | Endosome to TGN (ARF-Like)            |
| YOL018C    | TLG2        | Endosome to TGN T-SNARE               |
| YNL154C    | YCK2        | Casein Kinase I                       |
| YLL040C    | VPS13/SOI1  | TGN Retention                         |
| YGL104C    | VPS73       | Vacuolar Protein Sorting              |
| YPR029C    | APL4        | Clathrin Adaptor                      |
| YOR070C    | GYP1        | YPT3/1/32 GAP                         |
| YPR051W    | MAK3        | N-Acetyltransferase (ARL)             |

### CELL WALL BIOGENESIS

| <u>ORF</u> | <u>Gene</u> | <u>Function</u>                   |
|------------|-------------|-----------------------------------|
| YNL322C    | KRE1        | Cell Wall Organization/Biogenesis |
| YLR436C    | ECM30       | Cell Wall Organization/Biogenesis |
| YMR307W    | GAS1        | Cell Wall Organization/Biogenesis |
| YGR059W    | SPR3        | Cell Wall Organization/Biogenesis |
| YLR371W    | ROM2        | Cell Wall Organization/Biogenesis |
| YGR229C    | SMI1        | Cell Wall Organization/Biogenesis |
| YOR008C    | SLG1        | Cell Wall Organization/Biogenesis |
| YCR089W    | FIG2        | Cell Wall Organization/Biogenesis |

### CYTOSKELETON/POLARITY

| <u>ORF</u> | <u>Gene</u> | <u>Function</u>                        |
|------------|-------------|----------------------------------------|
| YOR299W    | BUD7        | Bud Site Selection                     |
| YDL151C    | BUD30       | Bud Site Selection                     |
| YOR300W    | HUF1        | Bud Site Selection                     |
| YCR047C    | BUD23       | Bud Site Selection                     |
| YPL161C    | BEM4        | Bud Site Selection                     |
| YLR429W    | CRN1        | MT Binding/Actin Filament Organization |
| YDR150W    | NUM1        | Tubulin Binding/NUC Migration          |
| YNL153C    | GIM3        | Tubulin Binding/Folding                |
| YML094W    | GIM5        | Tubulin Binding/Folding                |
| YGR078C    | PAC10       | Tubulin Binding/Folding                |

### LIPID TRAFFICKING/METABOLISM

| <u>ORF</u> | <u>Gene</u> | <u>Function</u>                |
|------------|-------------|--------------------------------|
| YER166W    | DNF1        | Phospholipid Flippase          |
| YKR031C    | SPO14       | Phospholipase D                |
| YMR015C    | ERG5        | C-22 Sterol Desaturase         |
| YLR056W    | ERG3        | C-5 Sterol Desaturase          |
| YLR450W    | HMG2        | HMG CoA Reductase              |
| YPL057C    | SUR1        | MIPC Synthase                  |
| YBL011W    | SCT1        | Glycerol-3-P O-Acyltransferase |
| YNL231C    | SFH3        | Sec14-Like P1TP                |
| YPL087W    | YDC1        | DI-Hydroceramidase             |
| YLR372W    | SUR4/ELO3   | Fatty Acid Elongase            |
| YCR034W    | FEN1/ELO2   | Fatty Acid Elongase            |
| YOR011W    | AUS1        | MDR-Like Sterol Transporter    |
| YPL069C    | BTS1        | Farnesyltransferase            |

# Supplemental Table S3

**A**

Top 20 genes, annotated, up regulated

|              |               |
|--------------|---------------|
| <i>BTN2</i>  | <i>TOS3</i>   |
| <i>SPG1</i>  | <i>SMP1</i>   |
| <i>RPN4</i>  | <i>CIT2</i>   |
| <i>NRG1</i>  | <i>BRR6</i>   |
| <i>ICY2</i>  | <i>NCE103</i> |
| <i>HSP42</i> | <i>ARO10</i>  |
| <i>TIM18</i> | <i>ARL3</i>   |
| <i>OSW1</i>  | <i>UPC2</i>   |
| <i>STI1</i>  | <i>HSP82</i>  |
| <i>RTS3</i>  | <i>TPO4</i>   |

**B**

Top 20 genes, annotated, down regulated

|               |               |
|---------------|---------------|
| <i>VPS20</i>  | <i>PHO3</i>   |
| <i>HMRA1</i>  | <i>YHB1</i>   |
| <i>COS7</i>   | <i>RPL16B</i> |
| <i>URA3</i>   | <i>RPL22A</i> |
| <i>COS12</i>  | <i>RPL20B</i> |
| <i>ADE17</i>  | <i>RPL14A</i> |
| <i>RPS22A</i> | <i>RPS18B</i> |
| <i>RPL20A</i> | <i>RPS11A</i> |
| <i>RPS7A</i>  | <i>RPS10A</i> |
| <i>RPS4A</i>  | <i>RPS11B</i> |
